# Supplementary material
Source: PubMed Central journal article supplement (PMC1087993)
Supplement: plntcell_tpc.104.029975_4.pdf [file plntcell_tpc.104.029975_4.pdf]

Figure S4

Repeat 1

```
Q9LX29_AT IATSYGEGGSVFCGLKSDG----SHLVVVCYGSNSA-----ILYGT---PGHLQ-----
Q948R7_OS IAVSYGEDGPVFCGLNSDC----SHLVTCFCADAS-----VVYGA---PSRIP-----
O24585_ZM IAVSYGEDGPVFCGLNSDC----SHLVACFCADAS-----VLYGA---PPNIP-----
Q6RZU8_MA IAVSYGENGPVFCGLSDG----SHLVACFCADAS-----IVYGA---PLRIP-----
Q9FIJ6_AT VSI SHISNQTIVCALNN-----HSYLQCSSFPLNS-----IPFSLT---GNLRRR---
Q9FUK3_NT VAI SKTSNQTLICALI SSSSFPQSSLNCTSFPEG-----IQIPLN---PS-VY-----
Q9LY50_AT -----GSDTVCALISGQP---TQRILCYDTRLN-----INVTLN---PG-VS-----
O80963_AT IA AAFGENG-FFCAIDASG---KQEVICWDRGNTNRS-----LNRPPEIGISG-YSP---
Q9S7D9_AT IA AAFGGSA-FFCAIDASG---RQDVICWCKNYSSPSSPSSSSSSSSIA---SSTSASYNIPS---
Q75IL7_OS -----GPTACAVAEGN-----STVYCASATNSS-----SSAA---VAPFVS---
Q6MJX2_BB NN I HVSNYN-GVCAKSPYG-----TYCWCNDNGSR-----ILNGASSMPQYVSPAGVD
```

Repeat 2

```
Q9LX29_AT FIGLTTGGDG-FMCGLLML---SHQPYCWGNS-AFIQMG-----VPQPMTKGAE---
Q948R7_OS FVGVTAGDG-FACGLLLD---TNQPYCWGNS-SYVKIG-----VPQPMVEGAM---
O24585_ZM FLGLTAGDG-FVCGLLLD---TRQPYCWGNS-SYVKSQ-----VPQPMVEGAR---
Q6RZU8_MA LLGLTAGDG-FVCGLLLD---TGQPYCWGNS-IFVKMG-----VPQPMVEGAS---
Q9FIJ6_AT FSGVIVSNG-FVCGLLSRLDSNTSTLLCWRFS-VDGTNM-----LHKRIYHCP---
Q9FUK3_NT FSGVIVGNG-FLCGLTSSYSSSISIMVWRF-NNGTNL-----SYKSTYLGPL---
Q9LY50_AT FSSLAAGDN-FLCGIRSG---GYSLLCWDNIGSYSPNR-----KRIVQNDNVL---
O80963_AT MTSLSGGEG-FLCAITSN---TSRAFVCWNLE--DPSENL-----VPRAF-QYNS---
Q9S7D9_AT MAVLSGGDG-FLCGILSN---TSQAFCSLSSGSSSGMDL-----VPLAY-RTTA---
Q75IL7_OS FSVVSGGGCAFVCGLQVG---GRALFCWPA---AAPGQ---L-RRVYNGPGQ---
Q6MJX2_BB WDYIKMGSN-FACGMTL---SGEIKCWGQG-TQQQLGNGSTAAVTTPTA-ISGGDY
```

Repeat 3

```
Q9LX29_AT YLEIVSAGDYHLCGLRKPVGRKNSNIIS--SLVDCWGNMTRNF-----VFDKQ-----
Q948R7_OS YSEL SAGDNHLCALRTSVKGFHSVN--GDTSVIDCWGNMNTATH-----TVTGA-----
O24585_ZM YSEL SAGDNHLCALRAAQDGGRSS--AAITSLIDCWGNMNTATH-----AVDEA-----
Q6RZU8_MA YSEL SAGDDHLCALRKPAIDSRK---GASLIDCWGNMNTASH-----EFDGS-----
Q9FIJ6_AT LEELIAGNFRICGVER-----VSRRLRCWQPYLPRP-----DN-----
Q9FUK3_NT IINLDSGNSHICGIVNG-----TNNRLCWOHEFNSS-----NRSLM-----
Q9LY50_AT LETLSVGDKQICATVNG-----INSLKWRGVSVDQSK-----PPNER-----
O80963_AT YLQIASGNNHVCALISGLYYSG-----PDYGPVHCWEISDNTNFTSGLLWNS--SFHNPYIDSL---
Q9S7D9_AT YSQI AAGNSHVCAVRGAYYS--HDSGTIDCWEITRATNNSLIAKENPNFYDQIVSNLV---
Q75IL7_OS LSQLAVGGGHVAAAYD-----AAARVIRWWRGGDRFP-----LWFGGG-----
Q6MJX2_BB YMQLSVCPSHACGITM-----SNVLKCGWANSASQLGDGTTTTR-----LSPVIIDSGTS
```

Repeat 4

```
Q9LX29_AT LHSLSAGSEFNICALSSKDKSVFCWGDENS SQ-----VISLIPKEKK--
Q948R7_OS VSAISAGSVFNCGLFARNRTVFCWGEDSVSG-----VIGLAPRNVR--
O24585_ZM VSTVSAGSVFNCGLFARNRTVFCWGETVSG-----VVGLAPRDLH--
Q6RZU8_MA VAAI IAGSVFSCGMFIENRTAFWGEDTSSG-----VISLTPRNLR--
Q9FIJ6_AT YRSIALGDNFVFCGLSQPPGMISCEG-----IAKVPSGDH--
Q9FUK3_NT TSNLAVGEDFVCGLLT-FGQIQCLG--SFRN-----VTDATPSGN--
Q9LY50_AT FRSIISGVSFSCGVSIENNRILCWGTDVPKS-----NQIQTFGNTP-
O80963_AT FRKIVSGDGFSCGVVTDGDLVWCW--PKSN-----LNFNSNEE--
Q9S7D9_AT FNNIVSGDGFSCGGI-RDGGMLCEG--PNSS-----NLGFNTTSDN--
Q75IL7_OS FASIVSGDDFTCAVETSTSAVRCW--PRGG-----AVEAGFLNAS--
Q6MJX2_BB YKVFSTGGTHICGITMAD-DLKCWGN--LGGKLGNGTTTNSMTPILIDSSIK
```

### Repeat 5

```
Q9LX29_AT FQKIAAGGYHVCGLDGLSRVLCWGSLEFEEVVTGTSTEEKILDLPKRP-----
Q948R7_OS FQSI GAGGYHVCVLE--NAQVFCWGRSLEMQQMSTPSSTDDGDVNI VPMDA-----
O24585_ZM FQSI GAGGYHVCVLE--NAQVFCWGRSLEMQQVVPSSAIGDGDVNI VPMDA-----
Q6RZU8_MA FQSI SAGGFHVCGILE--NSQVFCWGRSLETQQLS----LHGHDVKMVPMDP-----
Q9FIJ6_AT YIAIAAGSRQACAIT--VDNDVFCWQ---TQS-----LPRRK-----
Q9FUK3_NT YSEIASGSQHVCAISK--NNSLVCWGN-----MVGEKPIGQ-----
Q9LY50_AT MVTISAGKSHACGLNT--TGNLICITGNN-DSGQL-----NVIAPDQPNLY-----
O80963_AT FEVLASGRNSVCCVSK-DSGQLHCFGD-----ETEFGSLPNRPR----
Q9S7D9_AT FQVLAAGKNSVCAILN-LSREVKCWGE-----DESFVNSPUNDSR---
Q75IL7_OS VSALAAGGSACGVRR-NDGGVLCSSGGG-----VLAPREDLY---
Q6MJX2_BB YMTISAGTVSTCGIT--LPGSLK CWGENS-FGNVGN TSGGN---VLNPV EIDTGVN
```

### Repeat 6

```
Q9LX29_AT LLAVVGGKFYACGIKRYDHSAVCWGFFVNR-----STPAPTGTIG-----
Q948R7_OS MVSIVGGRFHACGIRSLDHQVACWGFTLQN-----STLAPKGLR-----
O24585_ZM MSTIVGGRFHACGIRSLDHQVACWGFTLHN-----STSPPKGLK-----
Q6RZU8_MA MVSIVACGRFHACGIKSLDHKAVCWCFMLQN-----SMPPPKDSR-----
Q9FIJ6_AT FLALAVGEDRCGVRWSNGTVVWCW-NNNN-----FS-LPQTLKDIH--
Q9FUK3_NT FKSIALALGDNRSCALR-INGKVVCW-ETG-----FS-LPSSLSGEF--
Q9LY50_AT SSSLISLGSNFTCAMRISNNSVVCWGGGAER-----FNNVTDSIS-----
O80963_AT FIALSAGANHYCGIREDDHGVECWG-RNLN SSS-----SSAENTSG-----
Q9S7D9_AT FVSLTAGPRHFCGIREDNHEVECWG--NSN-----FSLIPKSG-----
Q75IL7_OS VDGLAVGDSHACGLLRPNHTAACWSLGGATT-----FLYYPVAVGTA----
Q6MJX2_BB YTSVSVGEQMACGIG--DGQVKCWGLNSYGR LGLGGAAGDQNT PVEVSM LSAWGA
```

### Repeat 7

```
Q9LX29_AT FYDIAAGNYFTCGVLTGTS MSPVCWGLGFP---ASTPLA-----
Q948R7_OS VYAI VAGDYFTCGVPAETS LKPMCWGHSGP---LALPMA-----
O24585_ZM MYAI VAGDYFTCGVPAETS LMPRCWGN SGP---LALPMA-----
Q6RZU8_MA LYEIAAGDYFTCGVLAATSLRAVCWGTGVP---WSLPMA-----
Q9FIJ6_AT FTSIYAKGPMFCGVATR N-YTLICWGNENFKSG-VFTFQGLISQV---
Q9FUK3_NT FETIEAKQDIFCGIVTSN-YSLFCWGNDFNSNPAVFNGVG-----
Q9LY50_AT FESSSSGPLICGLISSN-LSIMCWNPTNFSR--IFLFFPE-----
O80963_AT FVAISSSDSTICGVRELD-LVLD CWRVHDSKADYSPPLEL-----
Q9S7D9_AT FKAISSDFIVCGIRED-LVLD CWMVNGSSTLAYDPPLEL-----
Q75IL7_OS FELIVAGGNLTCGLV SAN-FSLICW SRDGL--VAAE VNI PP-----
Q6MJX2_BB PMQVSTGSGTTCATT---SNRVVCWGE GMEGELGINTETNATSPMELIY
```
