# Supplementary material
Source: PubMed Central journal article supplement (PMC1087993)
Supplement: plntcell_tpc.104.029975_5.pdf [file plntcell_tpc.104.029975_5.pdf]

| Line                      | Total Lines<br>Counted | Full complementation | Partial complementation<br>Strong/Weak | No complementation |
|---------------------------|------------------------|----------------------|----------------------------------------|--------------------|
| ACR4                      | 26                     | 22                   | 2/0                                    | 2                  |
| ACR4:GFP                  | 22                     | 18                   | 1/0                                    | 3                  |
| $\Delta$ REPEAT           | 25                     | 0                    | 0/3                                    | 22                 |
| $\Delta$ REPEAT:GFP       | 28                     | 0                    | 0/5                                    | 23                 |
| $\Delta$ TNFR             | 23                     | 16                   | 2/2                                    | 3                  |
| $\Delta$ TNFR:GFP         | 56                     | 42                   | 7/6                                    | 1                  |
| $\Delta$ C-TER            | 27                     | 20                   | 3/2                                    | 2                  |
| $\Delta$ C-TER:GFP        | 30                     | 20                   | 0/6                                    | 4                  |
| KIN-NULL                  | 21                     | 20                   | 0                                      | 1                  |
| KIN-NULL:GFP              | 26                     | 19                   | 1/2                                    | 4                  |
| $\Delta$ TM/KIN/C-TER:GFP | 27                     | 0                    | 0                                      | 27                 |
| $\Delta$ KIN/C-TER        | 22                     | 0                    | 0/3                                    | 19                 |
| $\Delta$ KIN/C-TER:GFP    | 25                     | 0                    | 0/5                                    | 20                 |
| GFP:ACR4                  | 20                     | 0                    | 0/1                                    | 19                 |
| GFP:ACR4:GFP              | 23                     | 0                    | 0/3                                    | 20                 |
| ACR4C180Y:GFP             | 33                     | 0                    | 0/8                                    | 25                 |

Table S1

Summary of complementation study results. 2 siliques from each independent F1 transformant were analysed in which embryos were at roughly walking-stick stage. Full complementation is defined as fertilized siliques containing a full complement of wild-type shaped seeds. No complementation is defined as a phenotype indistinguishable from *acr4-2* siliques, i.e. high levels (>40%) of non-fertilized ovules, high levels (>10%) of subsequent seed abortion, heterogeneity of seed development and abnormal seed shape (small, rounded and irregular). Strong partial complementation is defined as almost wild-type to wild-type seed set (90-100%), little or no seed abortion, but seeds still abnormally rounded in shape. Weak partial complementation is defined as siliques showing medium seed set (10-40% unfertilized ovules) and reduced heterogeneity of developmental stage, but maintaining severe seed-shape defects.
