# Supplementary material
Source: PubMed Central journal article supplement (PMC1087993)
Supplement: plntcell_tpc.104.029975_6.pdf [file plntcell_tpc.104.029975_6.pdf]

| <b>TILLING allele</b> | <b>ABRC Stock No</b> | <b>Nucleotide change</b> | <b>Effect</b> | <b>Genotyping primers</b> | <b>RE Polymorphism gained/lost with mutation</b> |
|-----------------------|----------------------|--------------------------|---------------|---------------------------|--------------------------------------------------|
| <i>acr4-7</i>         | CS89759              | G309A                    | C180Y         | CAPS5/dG309A              | CAPS: loss of HhaI site                          |
| <i>acr4-8</i>         | CS94128              | G235A                    | W155*         | CAPS5/dG309A              | CAPS: gain of MnlI site                          |
| <i>acr4-9</i>         | CS93212              | G625A                    | W285*         | CAPS3/dC758T              | CAPS: gain of MnlI site                          |
| <i>acr4-10</i>        | CS92031              | G745A                    | W325*         | CAPS3/CAPS4               | CAPS: gain of MnlI site                          |
| <i>acr4-11</i>        | CS92277              | C59T                     | P97S          | CAPS1/dC59T               | dCAPS: loss of BslI site                         |
| <i>acr4-12</i>        | CS89742              | G72A                     | G101E         | CAPS1/dG72A               | dCAPS: loss of XmnI site                         |
| <i>acr4-13</i>        | CS90771              | G22A                     | D153N         | CAPS1/CAPS2               | CAPS: gain of MseI site                          |
| <i>acr4-14</i>        | CS91694              | G350A                    | D194N         | d235A/dG309A              | dCAPS: loss of BslI site                         |
| <i>acr4-15</i>        | CS86843              | C383T                    | P205S         | d383T/dG235A              | dCAPS: loss of BslI site                         |
| <i>acr4-16</i>        | CS91144              | G420A                    | G217E         | CAPS5/CAPS2               | CAPS: gain of HphI site                          |
| <i>acr4-17</i>        | CS86834              | C680T                    | L304F         | CAPS3/dC758T              | CAPS: loss of MboI site                          |
| <i>acr4-18</i>        | CS86715              | C689A                    | G307R         | CAPS3/CAPS4               | CAPS: gain of MnlI site                          |
| <i>acr4-19</i>        | CS89891              | C735T                    | P322L         | CAPS3/CAPS4               | CAPS: loss of HphI site                          |
| <i>acr4-20</i>        | CS91018              | G891A                    | P330S         | CAPS3/CRFUS1              | CAPS: gain of MwoI site                          |
| <i>acr4-21</i>        | CS87697              | C758T                    | P334L         | CAPS3/dC758T              | dCAPS: loss of BslI site                         |
| <i>acr4-22</i>        | CS93965              | C771T                    | S374N         | CAPS3/ dC771T             | dCAPS: loss of BslI site                         |

**Table S2.** Summary of tilling alleles isolated for this study
