# Supplementary material
Source: PubMed Central journal article supplement (PMC1087993)
Supplement: plntcell_tpc.104.029975_7.pdf [file plntcell_tpc.104.029975_7.pdf]

| <b>Tilling allele</b> | <b>ABRC Stock No</b> | <b>Nucleotide change</b> | <b>Effect</b> | <b>Genotyping primers</b>                                        | <b>Polymorphism gained/lost with mutation</b> |
|-----------------------|----------------------|--------------------------|---------------|------------------------------------------------------------------|-----------------------------------------------|
| <i>acr4-7</i>         | CS89759              | G309A                    | C170Y         | 5'AGTTCCTCAACCAATGACC (CAPS5)/<br>5'ATCTTTAGAGGGACATCGCG(dG309A) | CAPS: loss of HhaI site                       |
| <i>acr4-8</i>         | CS94128              | G235A                    | W155*         | CAPS5/dG309A                                                     | CAPS: gain of MnlI site                       |
| <i>acr4-9</i>         | CS93212              | G625A                    | W285*         | 5'ACTCTTAGCCGTGGTAGGTG(CAPS3)/<br>5'CAGCTAAACCCCAAGCAG(dC758T)   | CAPS: gain of MnlI site                       |
| <i>acr4-10</i>        | CS92031              | G745A                    | W325*         | CAPS3/5'TTGCAAGGCGACTTTTCTTGG                                    | CAPS: gain of MnlI site                       |

**Table S3.** Summary of the 4 Tilling alleles described in this study, and the strategy used for their genotyping
