# Supplementary material
Source: PubMed Central journal article supplement (PMC1087993)

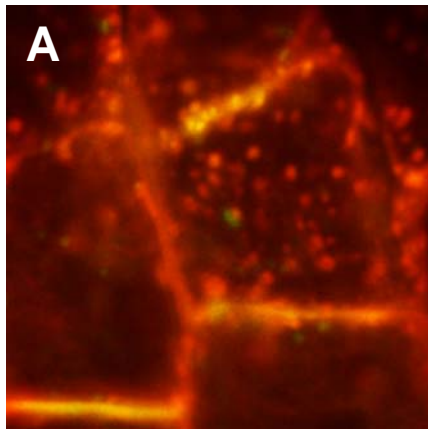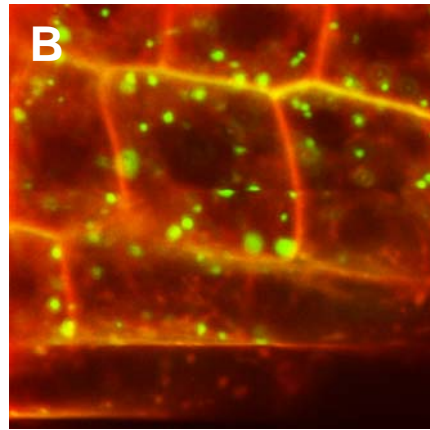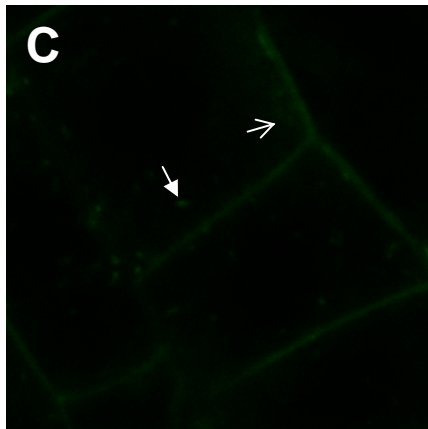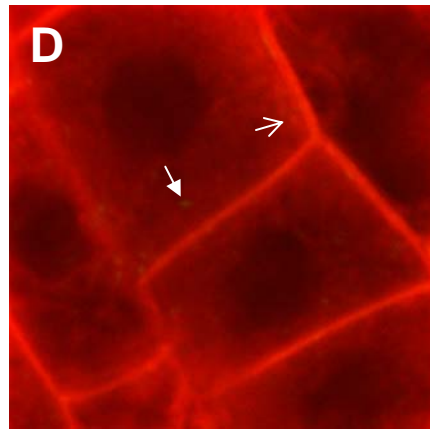

Supplement: plntcell_tpc.104.029975_1.pdf [file plntcell_tpc.104.029975_1.pdf]
